# Supplementary material
Source: publisher figshare collection journal article supplement (https://acs.figshare.com/ndownloader/files/5135719)
Supplement: Supplementary file 1 [file 5135719]

## Supporting Information

# Structural Characterization of an Enantiopure Hydroxo-bridged Binuclear Iron(III) Complex with Empty One-dimensional Helical Channels

Md. Akhtarul Alam†, Munirathinum Nethaji‡\*, and Manabendra Ray†\*

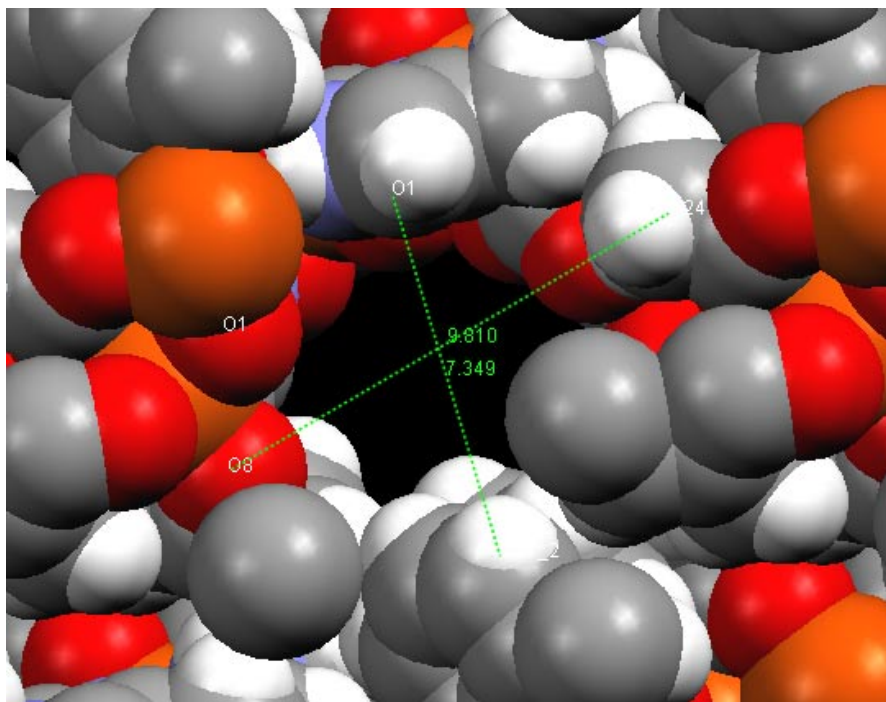

**Figure S1.** The cavity diameter in **1** was calculated by atom-atom distances between O8-C24 and O1-C11.

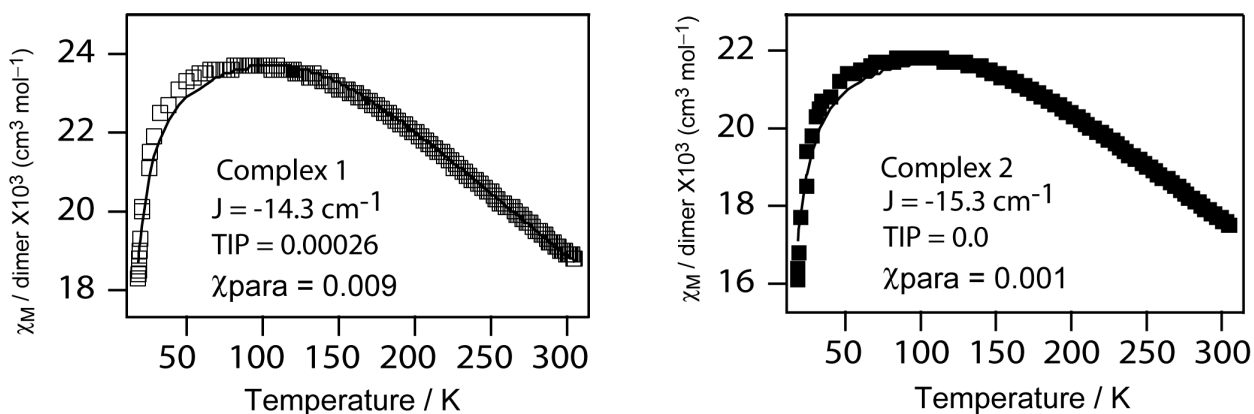

**Figure S2.** The magnetic susceptibility plots with parameters used in the fit. The fitting equation was taken from *J. Chem. Soc., Dalton Trans.*, **2001**, 2616 where  $g$  was kept fixed at 2.00 and  $\Theta$  was taken as zero.

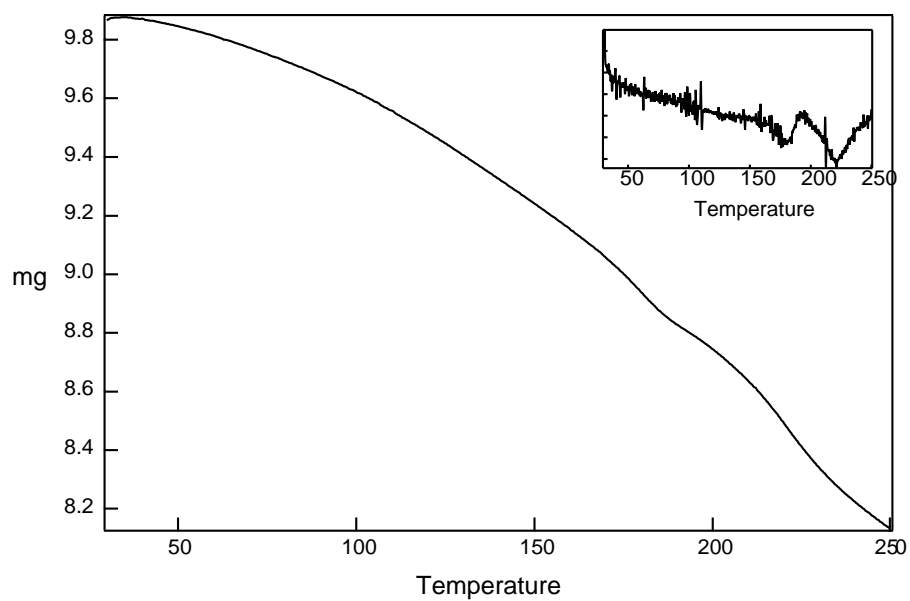

**Figure S3.** TGA plot of iodine doped **2** with derivative (DTA) plot of TGA as inset.

## Rehydration of the dried crystals

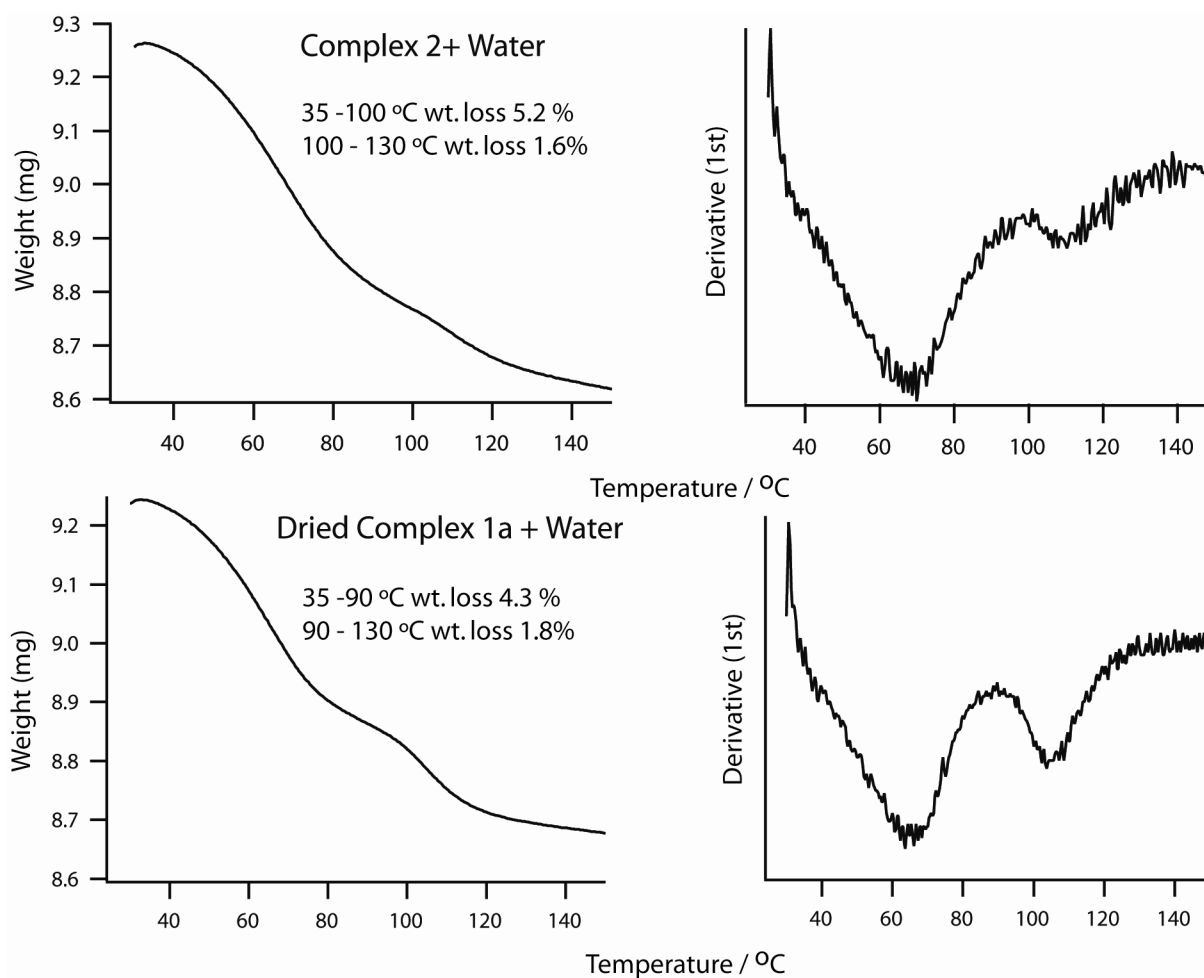

**Figure S4.** TGA (left) and DTA (right) plot of **2** and **1a** (dried at 90°C 2h) after exposure to water vapor for three days. Longer exposure to water does not have any effect on weight loss.

Figure S5 showing the 3H<sub>2</sub>O waters (disordered in **1**) and 1H<sub>2</sub>O in the channels of **1** and **1a** respectively. Table S1 have the bond parameters and occupancy used while solving the structure of **1**.

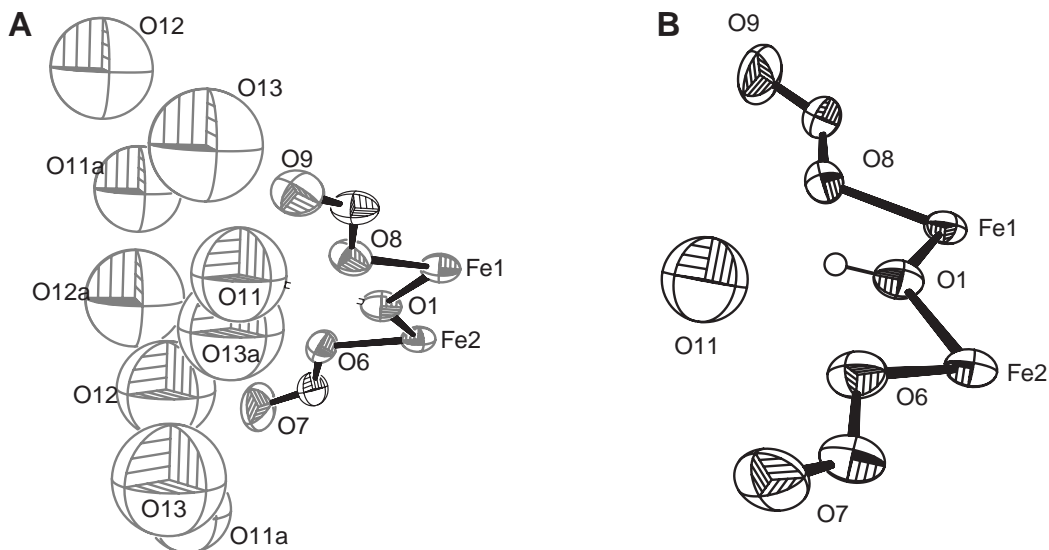

**Figure S5.** Water molecules in the channel of **1** (A) and **1a** (B).

**Table- S1**

| Atom                | Occupancy |           | Distances (Å)  |
|---------------------|-----------|-----------|----------------|
| <b>In <b>1</b></b>  |           |           |                |
| O11                 | 0.6       | O11-O11a  | 2.6002(0.0302) |
| O11a                | 0.4       | O11-O12a  | 2.9682(0.0275) |
| O12                 | 0.5       | O11-O13   | 2.4368(0.0311) |
| O12a                | 0.5       | O11a-O13a | 3.1709(0.0366) |
| O13                 | 0.6       | O12a-O13a | 2.7710(0.0400) |
| O13a                | 0.4       | O1-O13a   | 2.7850(0.0479) |
|                     |           | O13-O13a  | 3.3874(0.0419) |
|                     |           | O11-O12   | 3.1002(0.0301) |
| <b>In <b>1a</b></b> |           |           |                |
| O11                 | 1.0       | O1-O11    | 2.790          |

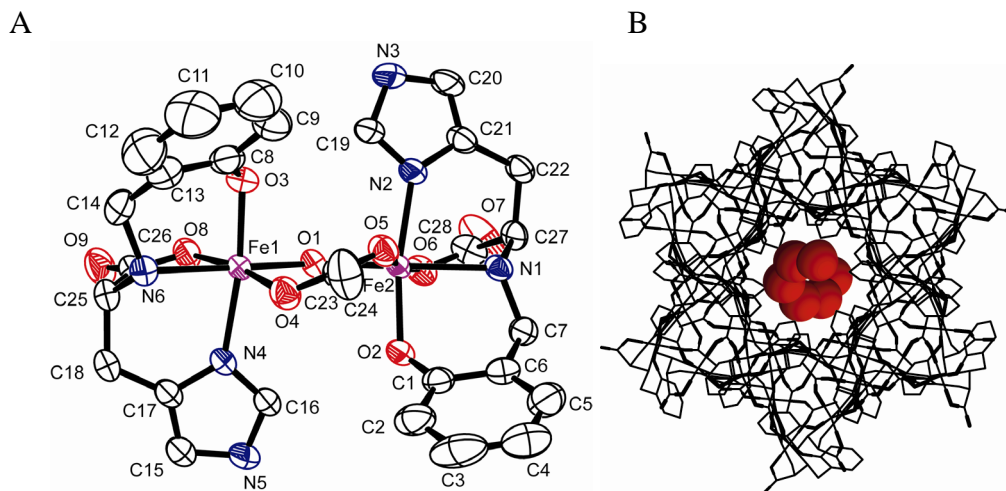

**Figure S6.** (a) ORTEP diagram of the complex **1a** (b) left handed helix formed by **1a**.

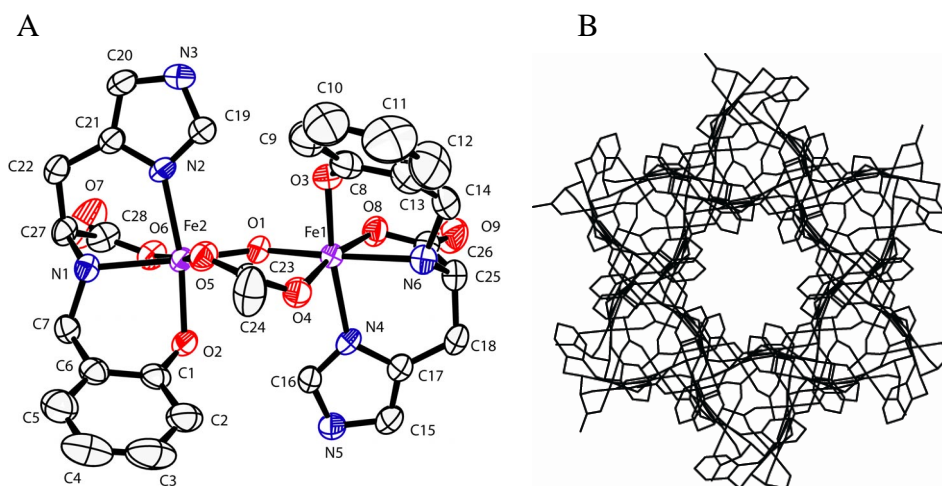

**Figure S7.** (a) ORTEP diagram of the complex **2** (b) Empty channel of **2**.

A

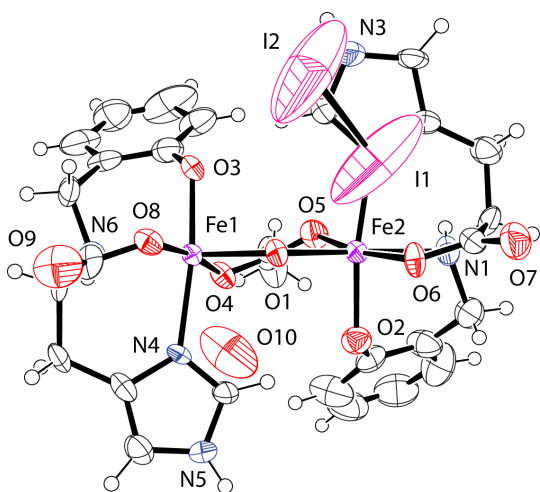

B

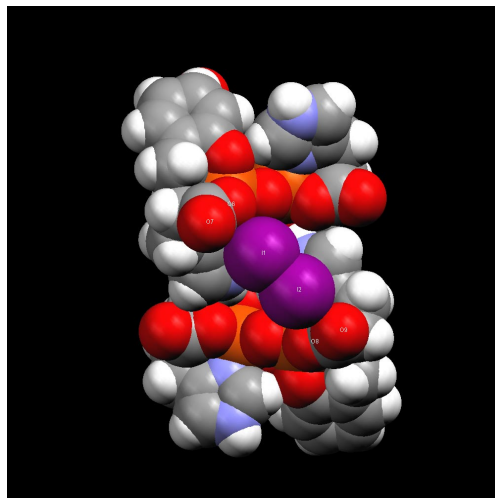

**Figure S8.** (a) ORTEP diagram of the complex **3** (b) Iodine molecules between two dimers in **3**.
